# Supplementary material for: Iron-Bound Lipocalin-2 from Tumor-Associated Macrophages Drives Breast Cancer Progression Independent of Ferroportin
Source: MDPI journal article supplement (doi:10.3390/metabo11030180), 2021-03-19
Supplement: s1 [file s1]

Supplemental Information

## **Iron-bound lipocalin-2 from tumor-associated macrophages drives breast cancer progression independent of ferroportin**

Christina Mertens<sup>1</sup>, Matthias Schnetz<sup>1</sup>, Claudia Rehwald<sup>1</sup>, Stephan Grein<sup>2</sup>, Eiman Elwakeel<sup>1</sup>, Andreas Weigert<sup>1,3</sup>, Bernhard Brüne<sup>1,3</sup>, Michaela Jung<sup>1\*</sup>

*Figure S1: 3D tumor spheroid model using stable Lcn-2R knockdown MCF-7 and MDA-MB-231 breast cancer cells. Knockdown efficiency and maintenance of the knockdown was routinely probed at mRNA (Suppl. Fig. S1a, b) and protein level (Suppl. Fig. S1c, d)*

*Figure S2: Basal knockdown effects on tumor spheroid growth*

*Figure S3: Iron levels of MCM-treated tumor cells*

*Supplemental material and methods: Generation of MΦ-conditioned medium (MCM) and MCM-stimulation of breast cancer cells*

*Supplemental references*

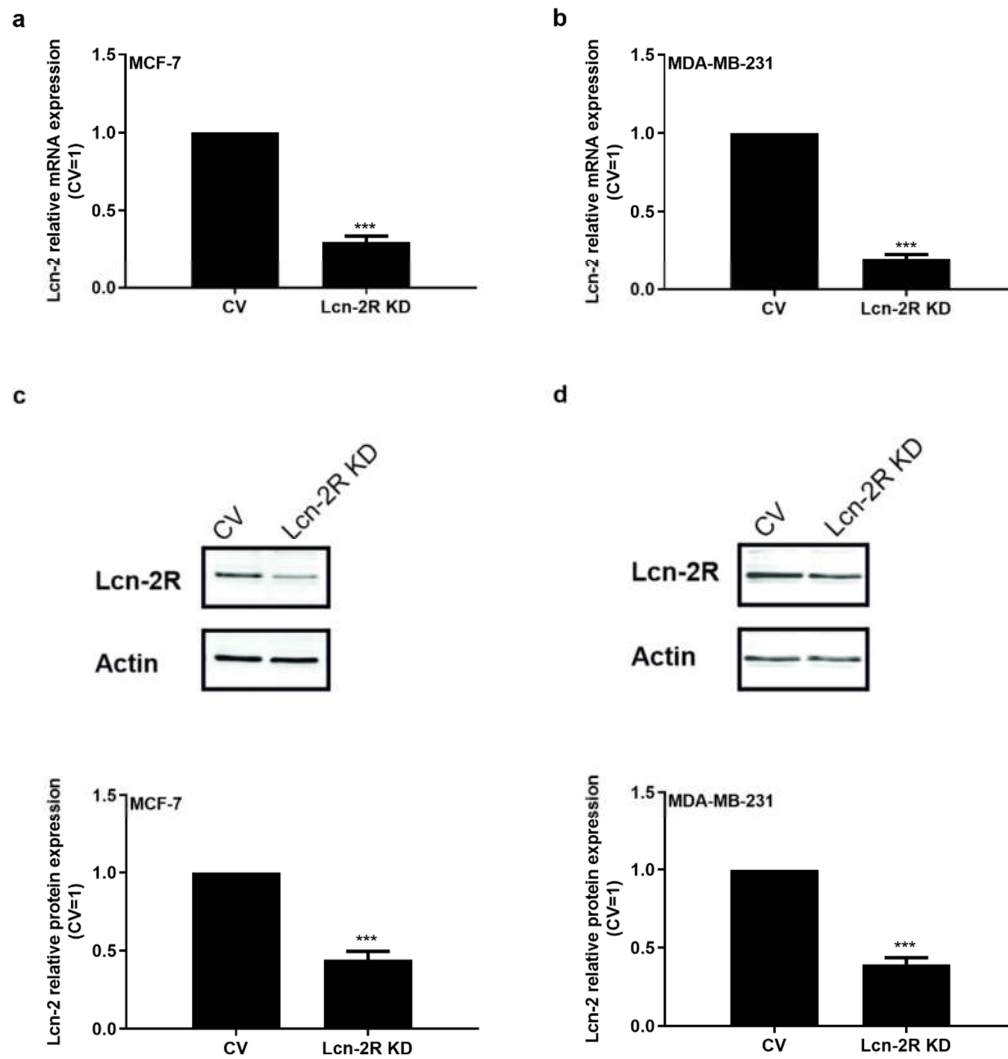

**Supplemental Figure S1.** 3D tumor spheroid model using stable Lcn-2R knockdown MCF-7 and MDA-MB-231 breast cancer cells. (a-d) Knockdown efficiency and maintenance of the knockdown was routinely probed at (a, b) mRNA and (c, d) protein level. Graphs are displayed as means  $\pm$  SEM. Statistically significant differences were calculated after analysis of variance (ANOVA) and Student's *t*-test, with \*\*\* $p < 0.001$ .

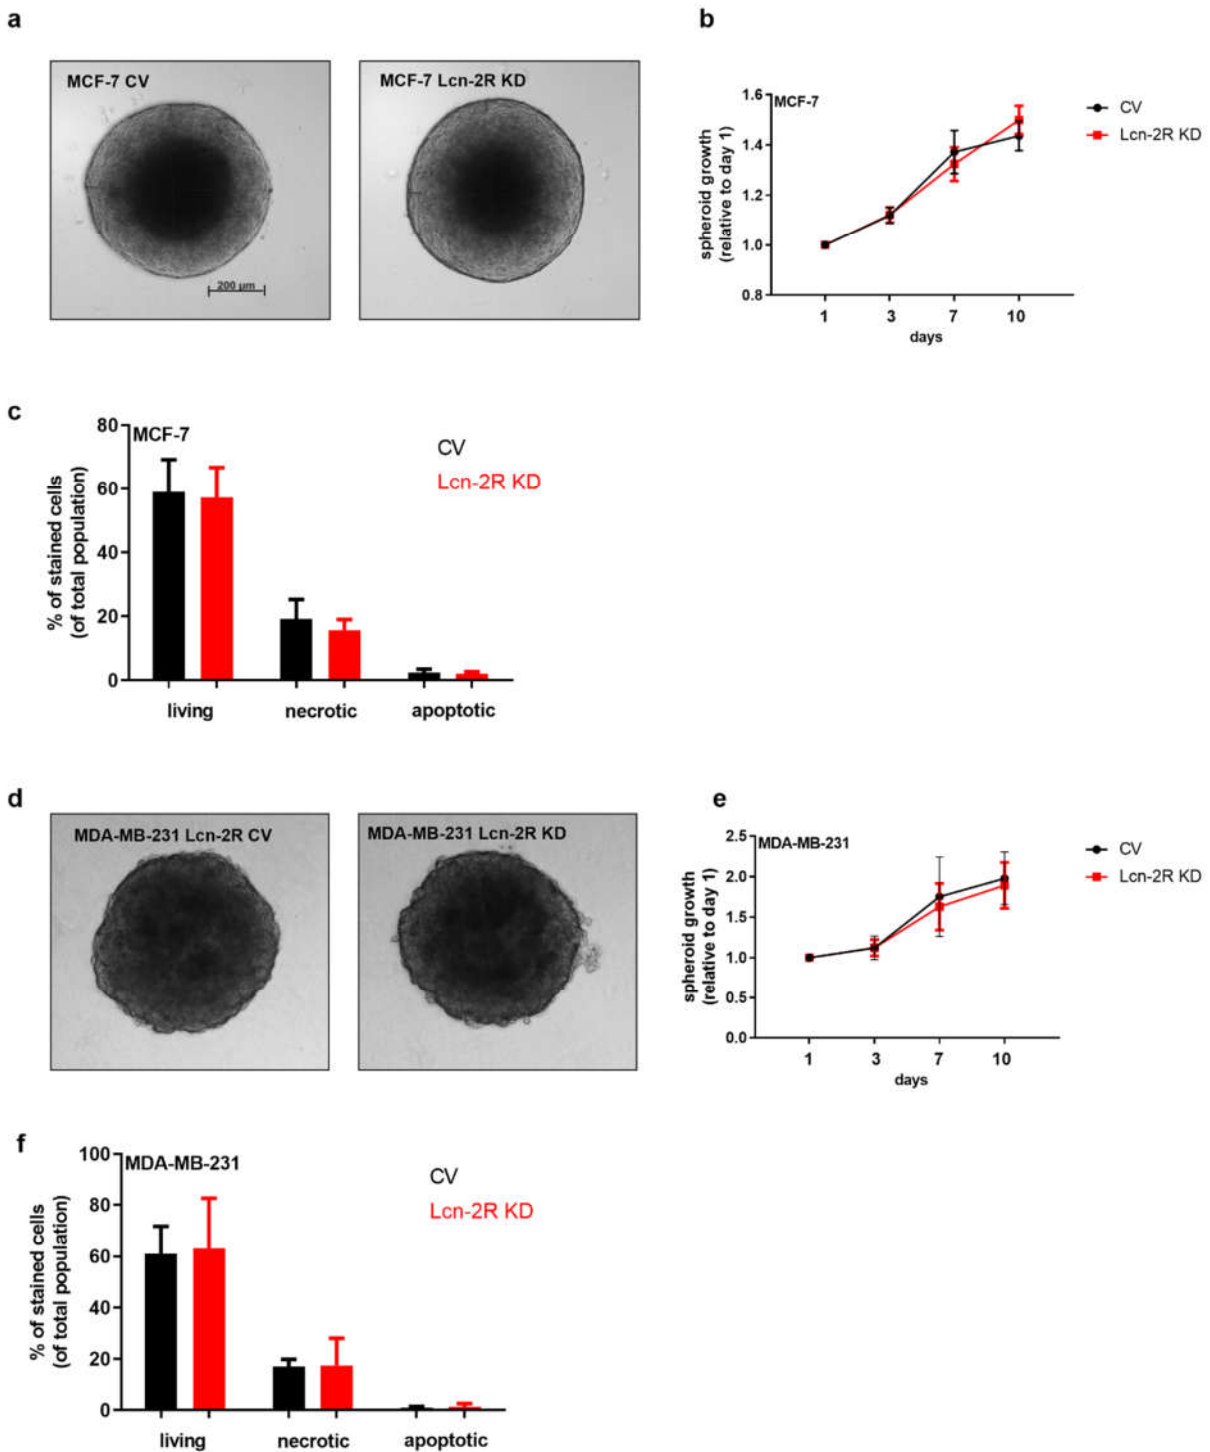

**Supplemental Figure S2.** Basal knockdown effects on tumor spheroid growth. (a) 3D tumor spheroid model using stable Lcn-2R knockdown MCF-7 and MDA-MB-231 breast cancer cells. Representative pictures out of at least 4 independent experiments are given. (b, c) Spheroid growth of Lcn-2R knockdown (KD) cells compared to infiltrated control virus (CV)-transduced cells, measured by the spheroid diameter for each time-point. (d, e) Measurement of cell death and survival by Annexin V/PI staining. Graphs are displayed as means  $\pm$  SEM. Statistically significant differences were calculated after analysis of variance (ANOVA) and Students *t*-test.

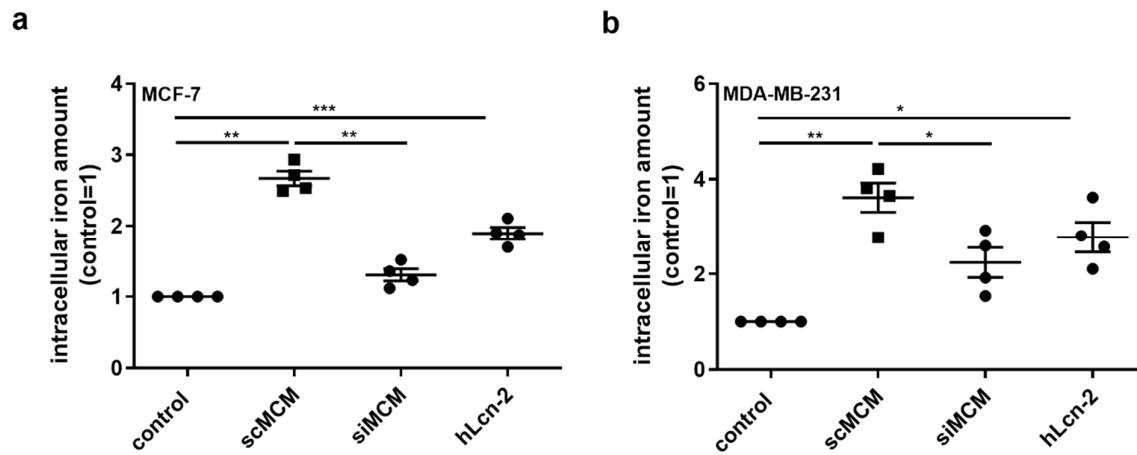

**Supplemental Figure S3.** Iron levels of MCM-treated tumor cells. (a) MCF-7 and (b) MDA-MB-231 breast cancer cells were stimulated with M $\Phi$ -conditioned medium (MCM) from scRNA-treated control M $\Phi$  or Lcn-2-knockdown M $\Phi$  (siMCM) for 24 h. Supernatant of unstimulated M $\Phi$  served as control. Recombinant iron-loaded Lcn-2 (1  $\mu$ g/ml) served as positive control. Iron levels were measured by AAS and are represented as relative iron levels with respect to untreated control cells. Graphs are displayed as means  $\pm$  SEM. Statistically significant differences were calculated after analysis of variance (ANOVA) and Students *t*-test, with \**p* < 0.05, \*\**p* < 0.01, \*\*\**p* < 0.001.

## Supplemental material and methods

### Generation of M $\Phi$ -conditioned medium (MCM) and MCM-stimulation of breast cancer cells

Human monocytes were isolated from commercially available buffy coats (DRK-Blutspendedienst Baden-Württemberg-Hessen, Frankfurt, Germany) using Ficoll-Hypaque gradients (PAA Laboratories, Solingen, Germany). Monocytes were differentiated into primary human M $\Phi$  with RPMI 1640 containing 5% AB-positive human serum (DRK-Blutspendedienst) for 7 days and achieved approximately 80% confluence.

GenMute® transfection reagent (SigmaGen, Offenbach, Germany) was used according to the manufacturer's instructions to knockdown Lcn-2. 50 nM LCN-2 siRNA (Qiagen, Hilden, Germany) was transfected into primary human M $\Phi$ . A non-targeting, scrambled siRNA (sictrl; Qiagen) was used as control.

24 h prior to stimulation, cells were serum-starved. According to our previous studies [1, 2, see below], 20 ng/ml IL-10 (PeproTech, Hamburg, Germany) was used for 24 h to induce an iron-release M $\Phi$  phenotype with enhanced secretion of iron-loaded Lcn-2. Conditioned media of polarized M $\Phi$  (MCM) were collected, centrifuged at 1000  $\times$  g for 5 min at 4°C, and aliquots were stored at -80°C until further use. Supernatant of unstimulated M $\Phi$  served as control.

Human MCF-7 and MDA-MB-231 breast cancer cells were maintained in DMEM medium (Thermo Fisher Scientific, Dreieich, Germany), supplemented with 10% fetal bovine serum (Capricorn Scientific, Ebersdorfergrund, Germany), 100 U/ml penicillin, and 100  $\mu$ g/ml streptomycin (Sigma-Aldrich, Darmstadt, Germany). Cells were cultivated at 37°C in a humidified atmosphere with 5% CO<sub>2</sub>. 24 h prior to stimulation, cells were serum-starved. We stimulated breast cancer cells with MCM from scRNA-treated M $\Phi$  (scMCM) or siLcn-2- M $\Phi$  (siMCM) for 24 h. Supernatants from unstimulated M $\Phi$  served as control. Treatment with recombinant iron-loaded Lcn-2 (hLcn-2; 1  $\mu$ g/ml) served as positive control. Afterwards, cells were washed and harvested and the cell lysates were used to quantify intracellular iron levels via AAS measurements.

### Supplemental References:

1. Schnetz M, Meier JK, Rehwald C, Mertens C, Urbschat A, Tomat E, Akam EA, Baer P, Roos FC, Brune B *et al*: **The Disturbed Iron Phenotype of Tumor Cells and Macrophages in Renal Cell Carcinoma Influences Tumor Growth.** *Cancers (Basel)* 2020, **12**(3).
2. Mertens C, Akam EA, Rehwald C, Brune B, Tomat E, Jung M: **Intracellular Iron Chelation Modulates the Macrophage Iron Phenotype with Consequences on Tumor Progression.** *PLoS One* 2016, **11**(11):e0166164.
